# Supplementary material for: Homo and heteropolymetallic Group 4 molecular nitrides
Source: Royal Society of Chemistry journal article supplement (doi:10.1039/c5dt02836a), 2015-01-01

## Electronic Supplementary Information for:

### Homo and heteropolymetallic Group 4 molecular nitrides

Jorge Caballo, Mainer Greño, Miguel Mena, Adrián Pérez-Redondo and Carlos Yélamos\*

*Departamento de Química Orgánica y Química Inorgánica, Universidad de Alcalá. 28871*

*Alcalá de Henares-Madrid (Spain). FAX: (+34) 91-8854683. E-mail:*

*carlos.yelamos@uah.es*

### Contents:

- Kinetic data and analyses for the dynamic NMR process observed for a solution of complex  $[(\eta^5\text{-C}_5\text{H}_5)\text{Cl}_2\text{Zr}\{(\mu_3\text{-N})(\mu_3\text{-NH})_2\text{Ti}_3(\eta^5\text{-C}_5\text{Me}_5)_3(\mu_3\text{-N})\}]$  (**9**) in  $\text{CDCl}_3$ .
- Selected lengths and angles for the two crystallographic independent molecules of compound **13**· $\text{C}_7\text{H}_8$ .
- View along the a axe of the crystal lattice of **15**.

**Table S1** Kinetic data for the dynamic NMR process observed for a solution of complex  $[(\eta^5\text{-C}_5\text{H}_5)\text{Cl}_2\text{Zr}\{(\mu_3\text{-N})(\mu_3\text{-NH})_2\text{Ti}_3(\eta^5\text{-C}_5\text{Me}_5)_3(\mu_3\text{-N})\}]$  (**9**) in  $\text{CDCl}_3$ .

| T (K) | k (s <sup>-1</sup> ) | 1/T (K <sup>-1</sup> ) | lnk     | ln(k/T)  |
|-------|----------------------|------------------------|---------|----------|
| 233   | 2                    | 0.00429                | 0.69315 | -4.75789 |
| 243   | 7                    | 0.00412                | 1.94591 | -3.54715 |
| 253   | 23                   | 0.00395                | 3.13549 | -2.39790 |
| 263   | 75                   | 0.00380                | 4.31749 | -1.25467 |
| 268   | 122                  | 0.00373                | 4.80402 | -0.78697 |
| 273   | 190                  | 0.00366                | 5.24702 | -0.36245 |
| 280   | 355                  | 0.00357                | 5.87212 | 0.23733  |
| 287   | 545                  | 0.00348                | 6.30079 | 0.64130  |
| 294   | 875                  | 0.00340                | 6.77422 | 1.09064  |
| 298   | 1110                 | 0.00336                | 7.01212 | 1.31502  |
| 305   | 1525                 | 0.00328                | 7.32975 | 1.60944  |
| 313   | 2230                 | 0.00319                | 7.70976 | 1.96355  |

**Figure S1** Arrhenius plot for the exchange in complex  $[(\eta^5\text{-C}_5\text{H}_5)\text{Cl}_2\text{Zr}\{(\mu_3\text{-N})(\mu_3\text{-NH})_2\text{Ti}_3(\eta^5\text{-C}_5\text{Me}_5)_3(\mu_3\text{-N})\}]$  (**9**) in  $\text{CDCl}_3$ .

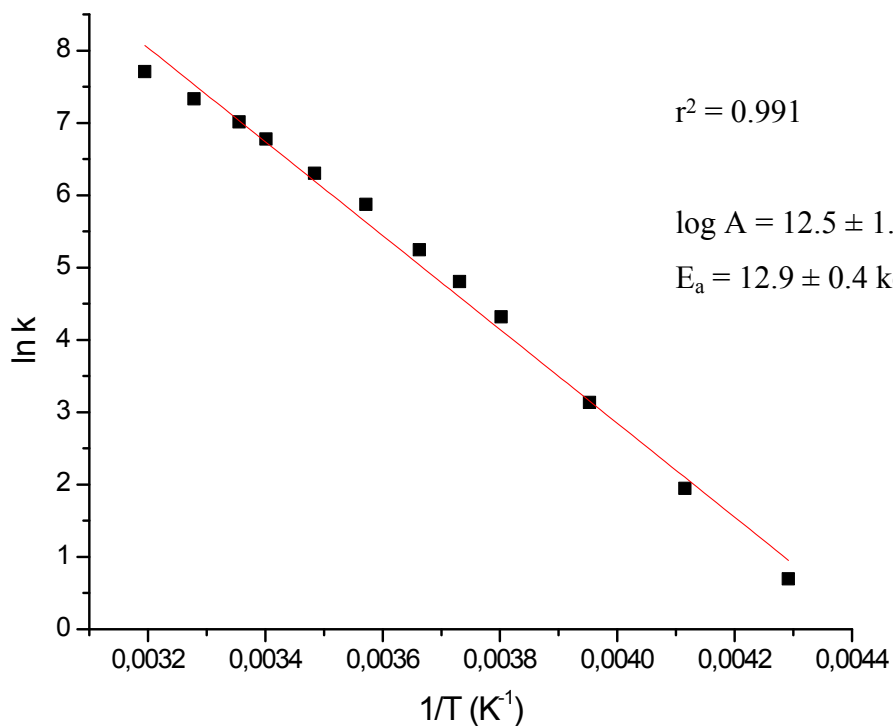

**Figure S2** Eyring plot for the exchange in complex  $[(\eta^5\text{-C}_5\text{H}_5)\text{Cl}_2\text{Zr}\{(\mu_3\text{-N})(\mu_3\text{-NH})_2\text{Ti}_3(\eta^5\text{-C}_5\text{Me}_5)_3(\mu_3\text{-N})\}]$  (**9**) in  $\text{CDCl}_3$ .

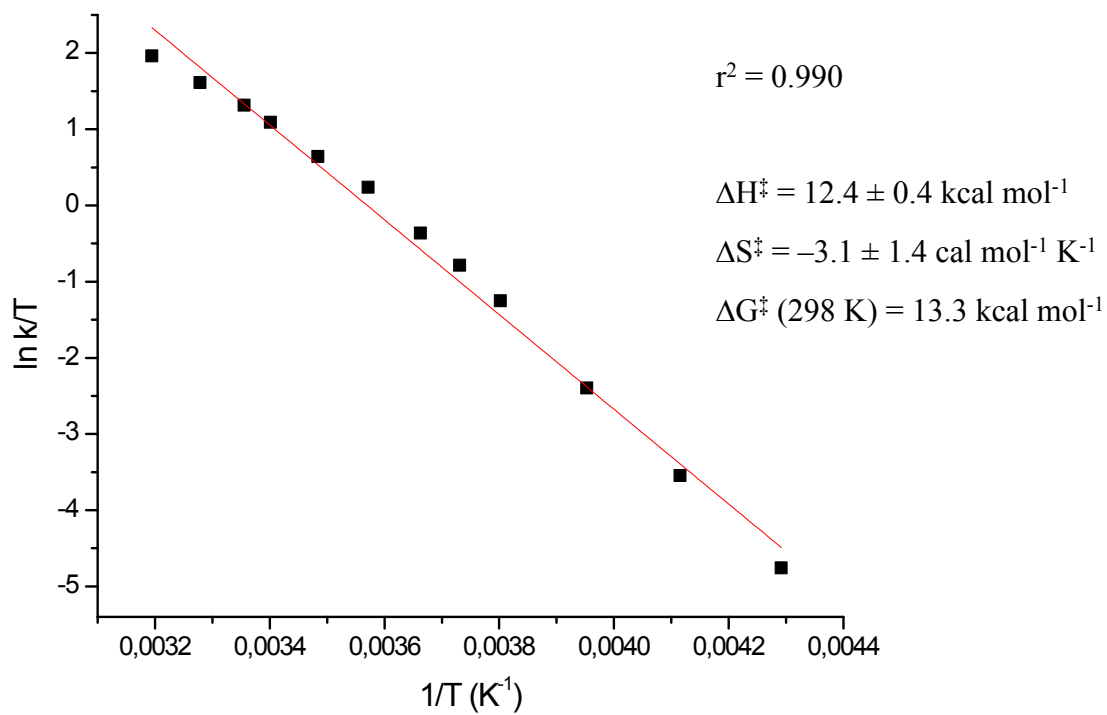

**Table S2** Selected lengths (Å) and angles (°) for **13**.

| <i>Molecule 1</i> |          |                   |          |
|-------------------|----------|-------------------|----------|
| Zr(1)–N(12)       | 2.194(3) | Zr(1)–N(13)       | 2.203(3) |
| Zr(1)–N(23)       | 2.447(3) | Mg(1)–N(23)       | 2.131(4) |
| Zr(1)–Cl(1)       | 2.607(1) | Zr(1)–Cl(2)       | 2.620(1) |
| Mg(1)–Cl(1)       | 2.512(2) | Mg(1)–Cl(2)       | 2.469(2) |
| Ti(1)–N(12)       | 1.957(3) | Ti(1)–N(13)       | 1.940(3) |
| Ti(2)–N(12)       | 1.972(4) | Ti(2)–N(23)       | 1.908(3) |
| Ti(3)–N(13)       | 1.969(3) | Ti(3)–N(23)       | 1.906(3) |
| Ti(1)–N(1)        | 1.915(4) | Ti(2)–N(1)        | 1.931(3) |
| Ti(3)–N(1)        | 1.939(3) | Ti(1)···Ti(2)     | 2.834(1) |
| Ti(1)···Ti(3)     | 2.831(1) | Ti(2)···Ti(3)     | 2.780(1) |
| Zr(1)···Ti(1)     | 3.074(1) | Zr(1)···Ti(2)     | 3.114(1) |
| Zr(1)···Ti(3)     | 3.127(1) | Zr(1)···Mg(1)     | 3.259(2) |
| N(12)–Zr(1)–N(13) | 77.7(1)  | N(12)–Zr(1)–N(23) | 76.4(1)  |
| N(13)–Zr(1)–N(23) | 75.9(1)  | Cl(1)–Zr(1)–Cl(2) | 82.4(1)  |
| Cl(1)–Zr(1)–Cm(1) | 101.8(1) | Cl(2)–Zr(1)–Cm(1) | 100.0(1) |
| N(12)–Zr(1)–Cl(1) | 151.1(1) | N(12)–Zr(1)–Cl(2) | 95.5(1)  |
| N(12)–Zr(1)–Cm(1) | 107.0(1) | N(13)–Zr(1)–Cl(1) | 89.8(1)  |
| N(13)–Zr(1)–Cl(2) | 150.0(1) | N(13)–Zr(1)–Cm(1) | 110.0(1) |
| N(23)–Zr(1)–Cl(1) | 75.3(1)  | N(23)–Zr(1)–Cl(2) | 74.1(1)  |
| N(23)–Zr(1)–Cm(1) | 173.6(1) | Cl(1)–Mg(1)–Cl(2) | 87.5(1)  |
| Cl(1)–Mg(1)–Cm(2) | 118.6(1) | Cl(2)–Mg(1)–Cm(2) | 118.1(1) |
| N(23)–Mg(1)–Cl(1) | 83.0(1)  | N(23)–Mg(1)–Cl(2) | 82.9(1)  |
| N(23)–Mg(1)–Cm(2) | 148.6(1) | N(12)–Ti(1)–N(13) | 90.1(1)  |
| N(12)–Ti(2)–N(23) | 95.7(1)  | N(13)–Ti(3)–N(23) | 95.4(1)  |
| N(12)–Ti(1)–N(1)  | 86.8(2)  | N(13)–Ti(1)–N(1)  | 87.1(1)  |
| N(12)–Ti(2)–N(1)  | 85.9(2)  | N(23)–Ti(2)–N(1)  | 87.3(1)  |
| N(13)–Ti(3)–N(1)  | 85.6(1)  | N(23)–Ti(3)–N(1)  | 87.1(1)  |
| Zr(1)–Cl(1)–Mg(1) | 79.1(1)  | Zr(1)–Cl(2)–Mg(1) | 79.6(1)  |
| Zr(1)–N(23)–Mg(1) | 90.5(1)  | Ti(2)–N(23)–Mg(1) | 136.3(2) |
| Ti(3)–N(23)–Mg(1) | 130.1(2) | Zr(1)–N(23)–Ti(2) | 90.4(1)  |
| Zr(1)–N(23)–Ti(3) | 91.0(1)  | Ti(2)–N(23)–Ti(3) | 93.6(2)  |
| Zr(1)–N(12)–Ti(1) | 95.4(1)  | Zr(1)–N(12)–Ti(2) | 96.6(1)  |
| Ti(1)–N(12)–Ti(2) | 92.4(1)  | Zr(1)–N(13)–Ti(1) | 95.6(1)  |
| Zr(1)–N(13)–Ti(3) | 96.9(1)  | Ti(1)–N(13)–Ti(3) | 92.8(1)  |
| Ti(1)–N(1)–Ti(2)  | 95.0(2)  | Ti(1)–N(1)–Ti(3)  | 94.6(2)  |
| Ti(2)–N(1)–Ti(3)  | 91.9(1)  |                   |          |
| <i>Molecule 2</i> |          |                   |          |
| Zr(2)–N(56)       | 2.151(3) | Zr(2)–N(57)       | 2.494(3) |
| Zr(2)–N(67)       | 2.232(3) | Mg(2)–N(57)       | 2.094(4) |
| Zr(2)–Cl(3)       | 2.615(1) | Zr(2)–Cl(4)       | 2.606(1) |
| Mg(2)–Cl(3)       | 2.474(2) | Mg(2)–Cl(4)       | 2.521(2) |
| Ti(5)–N(56)       | 1.955(4) | Ti(5)–N(57)       | 1.918(3) |
| Ti(6)–N(56)       | 1.904(4) | Ti(6)–N(67)       | 1.994(3) |
| Ti(7)–N(57)       | 1.906(4) | Ti(7)–N(67)       | 1.996(3) |
| Ti(5)–N(2)        | 1.950(3) | Ti(6)–N(2)        | 1.912(3) |

|                   |          |                   |          |
|-------------------|----------|-------------------|----------|
| Ti(7)–N(2)        | 1.919(3) | Ti(5)···Ti(6)     | 2.809(1) |
| Ti(5)···Ti(7)     | 2.786(1) | Ti(6)···Ti(7)     | 2.853(1) |
| Zr(2)···Ti(5)     | 3.097(1) | Zr(2)···Ti(6)     | 3.063(1) |
| Zr(2)···Ti(7)     | 3.182(1) | Zr(2)···Mg(2)     | 3.281(2) |
| N(56)–Zr(2)–N(57) | 76.4(1)  | N(56)–Zr(2)–N(67) | 77.9(1)  |
| N(57)–Zr(2)–N(67) | 75.1(1)  | Cl(3)–Zr(2)–Cl(4) | 81.4(1)  |
| Cl(3)–Zr(2)–Cm(3) | 101.3(1) | Cl(4)–Zr(2)–Cm(3) | 103.2(1) |
| N(56)–Zr(2)–Cl(3) | 150.2(1) | N(56)–Zr(2)–Cl(4) | 93.7(1)  |
| N(56)–Zr(2)–Cm(3) | 108.4(1) | N(57)–Zr(2)–Cl(3) | 74.0(1)  |
| N(57)–Zr(2)–Cl(4) | 74.1(1)  | N(57)–Zr(2)–Cm(3) | 174.8(1) |
| N(67)–Zr(2)–Cl(3) | 91.3(1)  | N(67)–Zr(2)–Cl(4) | 149.1(1) |
| N(67)–Zr(2)–Cm(3) | 107.7(1) | Cl(3)–Mg(2)–Cl(4) | 86.0(1)  |
| Cl(3)–Mg(2)–Cm(4) | 118.3(1) | Cl(4)–Mg(2)–Cm(4) | 119.7(1) |
| N(57)–Mg(2)–Cl(3) | 84.3(1)  | N(57)–Mg(2)–Cl(4) | 82.9(1)  |
| N(57)–Mg(2)–Cm(4) | 147.3(1) | N(56)–Ti(5)–N(57) | 96.3(2)  |
| N(56)–Ti(6)–N(67) | 89.9(1)  | N(57)–Ti(7)–N(67) | 95.4(1)  |
| N(56)–Ti(5)–N(2)  | 85.3(2)  | N(57)–Ti(5)–N(2)  | 86.5(2)  |
| N(56)–Ti(6)–N(2)  | 87.8(2)  | N(67)–Ti(6)–N(2)  | 86.4(1)  |
| N(57)–Ti(7)–N(2)  | 87.8(2)  | N(67)–Ti(7)–N(2)  | 86.1(1)  |
| Zr(2)–Cl(3)–Mg(2) | 80.3(1)  | Zr(2)–Cl(4)–Mg(2) | 79.6(1)  |
| Zr(2)–N(57)–Mg(2) | 90.9(1)  | Ti(5)–N(57)–Mg(2) | 133.3(2) |
| Ti(7)–N(57)–Mg(2) | 133.2(2) | Zr(2)–N(57)–Ti(5) | 88.2(1)  |
| Zr(2)–N(57)–Ti(7) | 91.7(1)  | Ti(5)–N(57)–Ti(7) | 93.5(2)  |
| Zr(2)–N(56)–Ti(5) | 97.8(2)  | Zr(2)–N(56)–Ti(6) | 98.0(2)  |
| Ti(5)–N(56)–Ti(6) | 93.4(2)  | Zr(2)–N(67)–Ti(6) | 92.7(1)  |
| Zr(2)–N(67)–Ti(7) | 97.5(1)  | Ti(6)–N(67)–Ti(7) | 91.3(1)  |
| Ti(5)–N(2)–Ti(6)  | 93.3(2)  | Ti(5)–N(2)–Ti(7)  | 92.1(1)  |
| Ti(6)–N(2)–Ti(7)  | 96.3(2)  |                   |          |

Cm(1) = centroid of the C(41)–C(45) ring; Cm(2) = centroid of the C(46)–C(50) ring;

Cm(3) = centroid of the C(81)–C(85) ring; Cm(4) = centroid of the C(86)–C(90) ring.

**Figure S3** View along the a axe of the crystal lattice of **15**. Benzene molecules of crystallization are omitted for clarity.

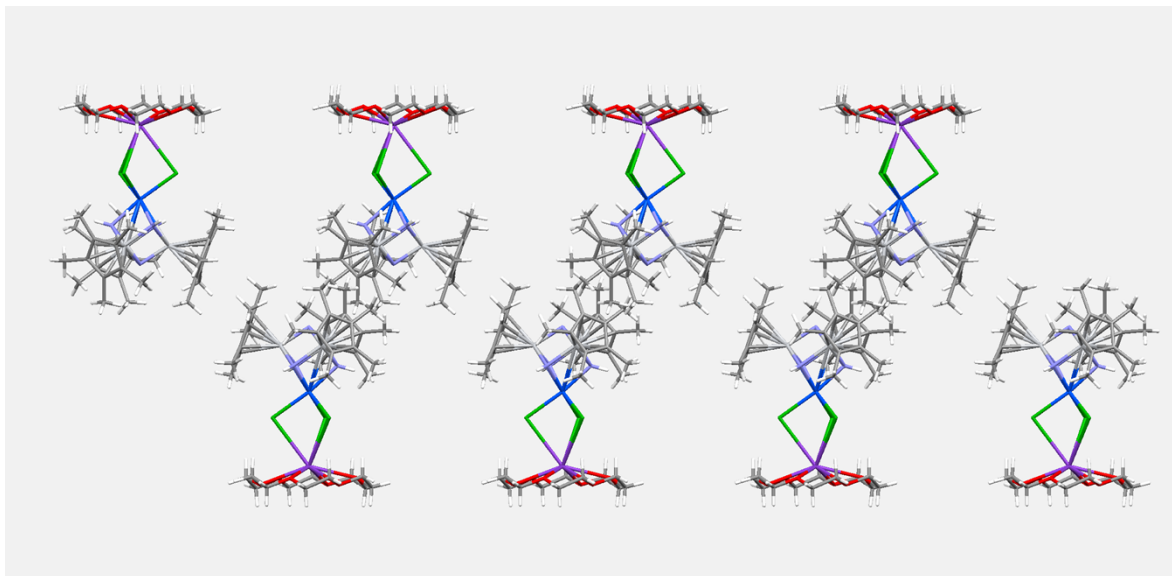

Supplement: c5dt02836a1.pdf [file c5dt02836a1.pdf]
